# Supplementary material for: Multifunctional NaLnF4@MOF-Ln Nanocomposites with Dual-Mode Luminescence for Drug Delivery and Cell Imaging
Source: PubMed Central journal article supplement (PMC6781070; doi:10.3390/nano9091274), 2019-09-06
Supplement: nanomaterials-09-01274-s001.pdf [file nanomaterials-09-01274-s001.pdf]

# Multifunctional NaLnF<sub>4</sub>@MOF-Ln Nanocomposites with Dual-Mode Luminescence for Drug Delivery and Cell Imaging

Dan Wang<sup>1</sup>, Chen Zhao<sup>1</sup>, Guoyang Gao<sup>1</sup>, Linna Xu<sup>1</sup>, Guofeng Wang<sup>1,\*</sup> and Peifen Zhu<sup>2,\*</sup>

<sup>1</sup> Affiliation<sup>1</sup>Key Laboratory of Functional Inorganic Material Chemistry, Ministry of Education, School of Chemistry and Materials Science, Heilongjiang University, Harbin, 150080, China

<sup>2</sup> Department of Physics and Engineering Physics, The University of Tulsa, Tulsa, Oklahoma 74104, USA

\* Correspondence: 2010070@hlju.edu.cn (G. W); peifen-zhu@utulsa.edu (P. Z); Tel.: +1-918-631-5125 (G. W)

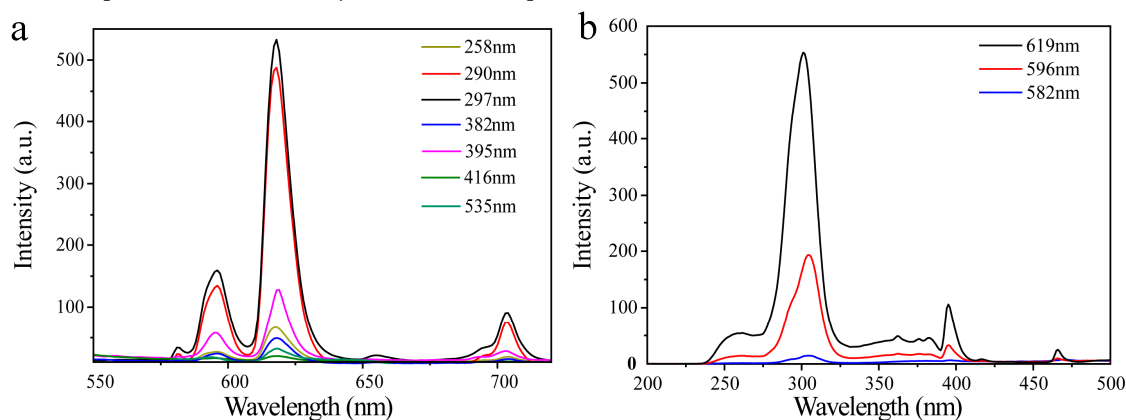

**Figure S1** (a) DC emission spectra of NYFT@MOFY-1 excited at different wavelengths, (b) DC excitation spectra of NYFT@MOFY-1 by monitoring emission at different wavelengths.

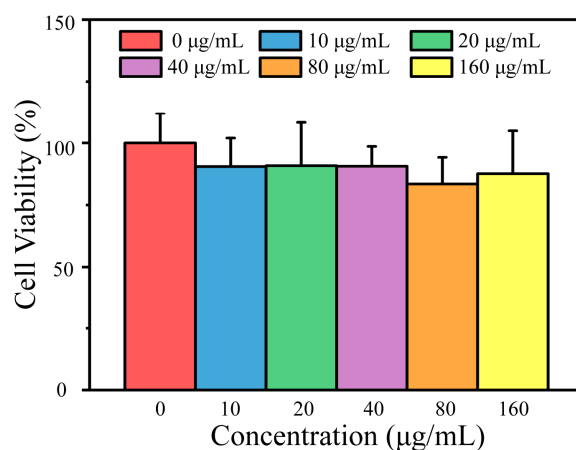

**Figure S2.** In vitro cell viability was measured by MTT assay after incubation of HeLa cancer cells at different concentrations with pure NYFT@MOFY-1 nanocomposites for 4 h.
